# Supplementary figures and images for: Antioxidants and Oxidants in Boar Spermatozoa and Their Surrounding Environment Are Associated with AMPK Activation during Liquid Storage
Source: MDPI journal article supplement (doi:10.3390/vetsci10030214), 2023-03-10

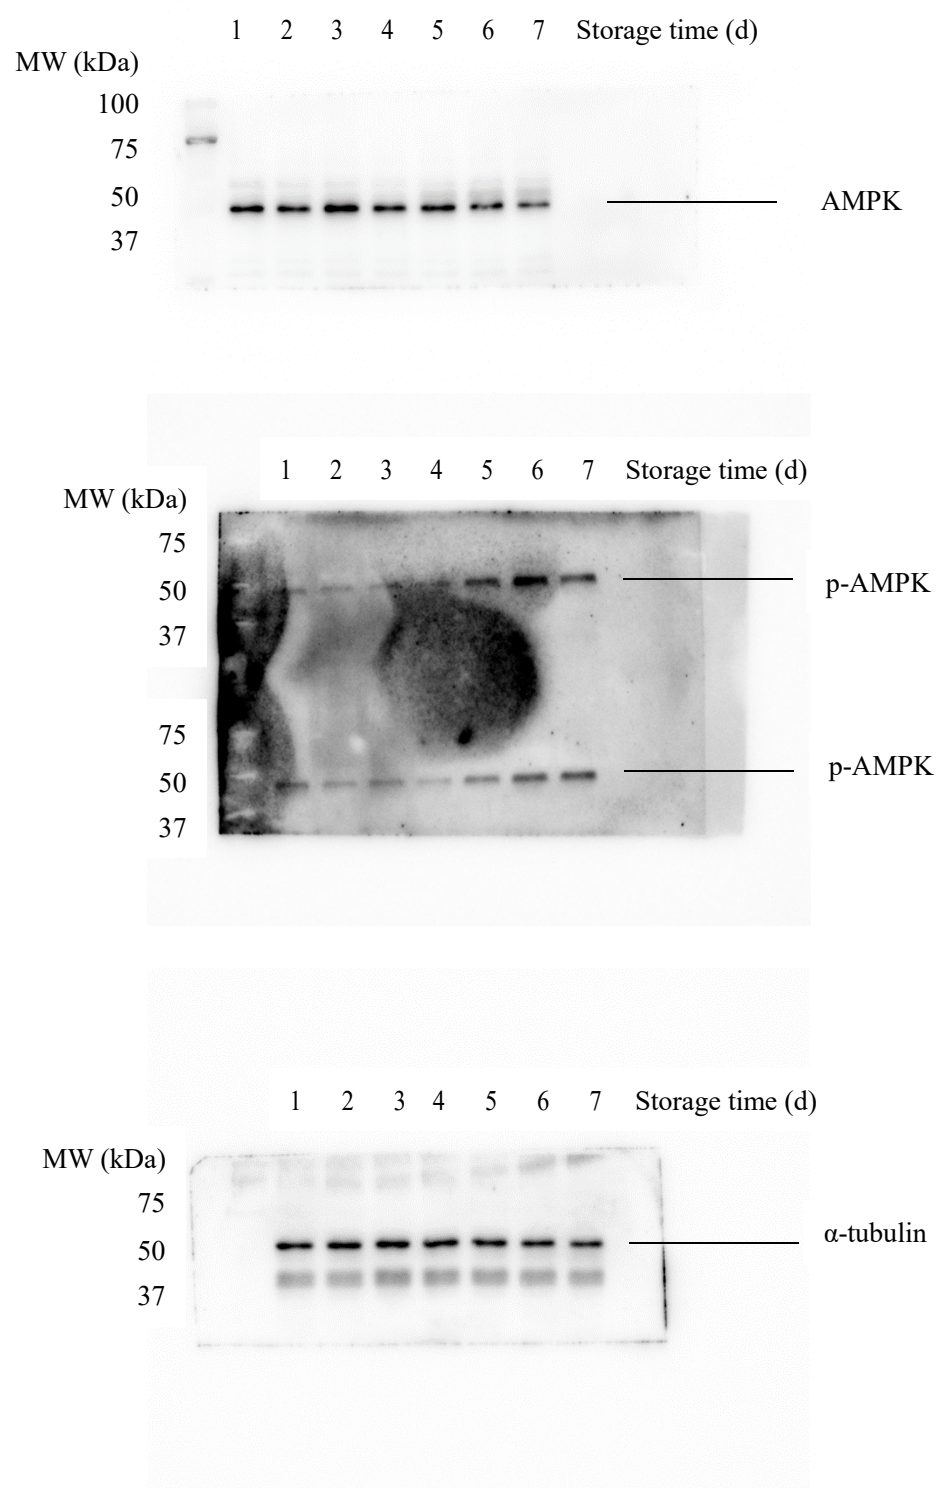

**Figure S1.** WB full membrane for Figures 3.

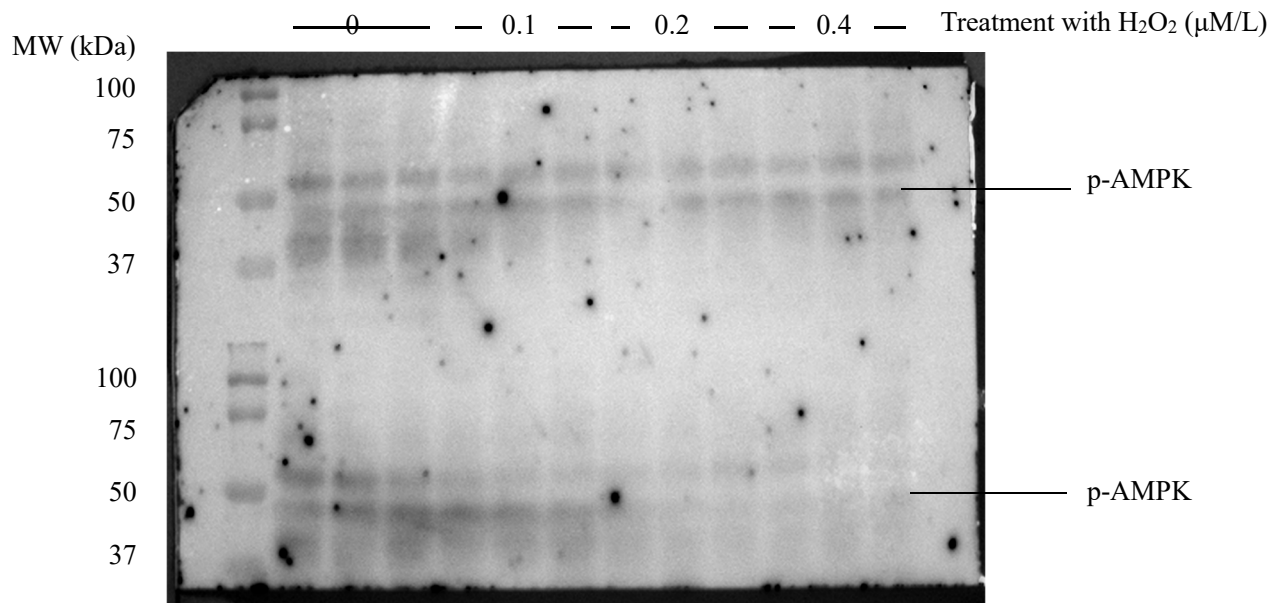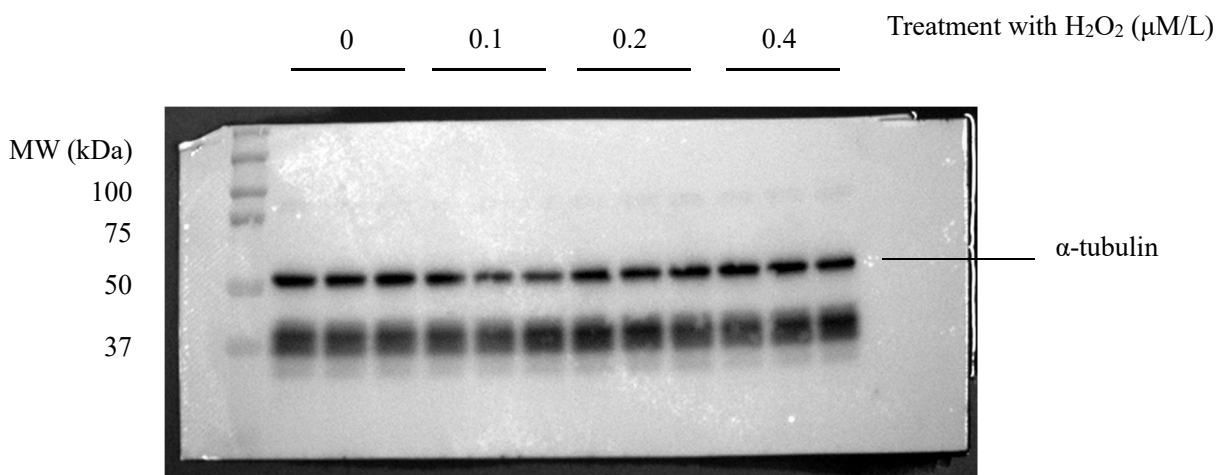

**Figure S2.** WB full membrane for Figures 6.

Supplement: s1 [file s1]
